# Supplementary material
Source: HighWire-hosted journal article supplement (https://erj.ersjournals.com/content/54/1/1802041)

# Supplementary Figure 1A

## Haplotypes of families 1&2

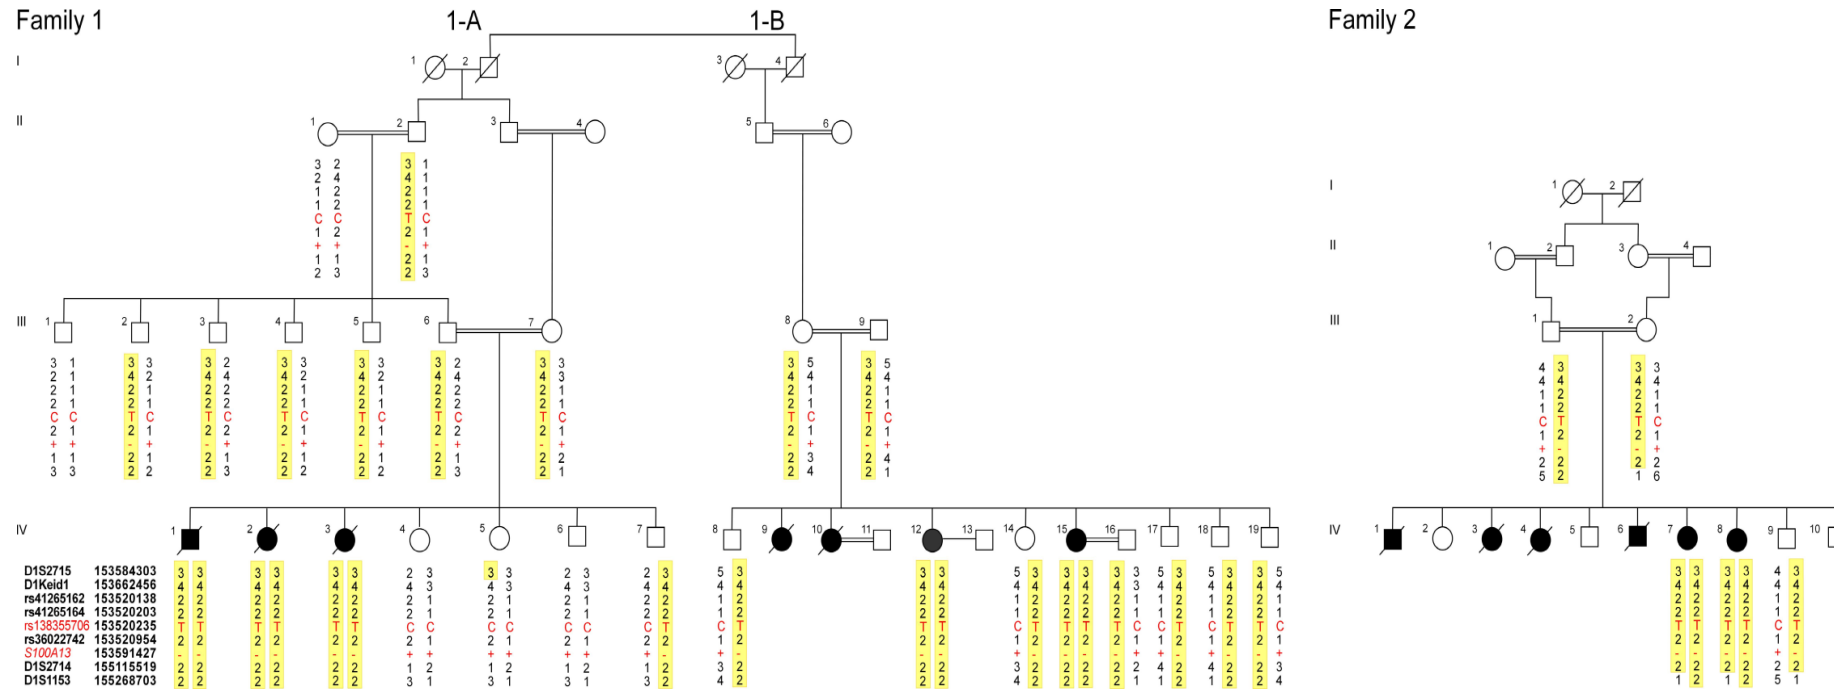

Supplementary Figure 1B

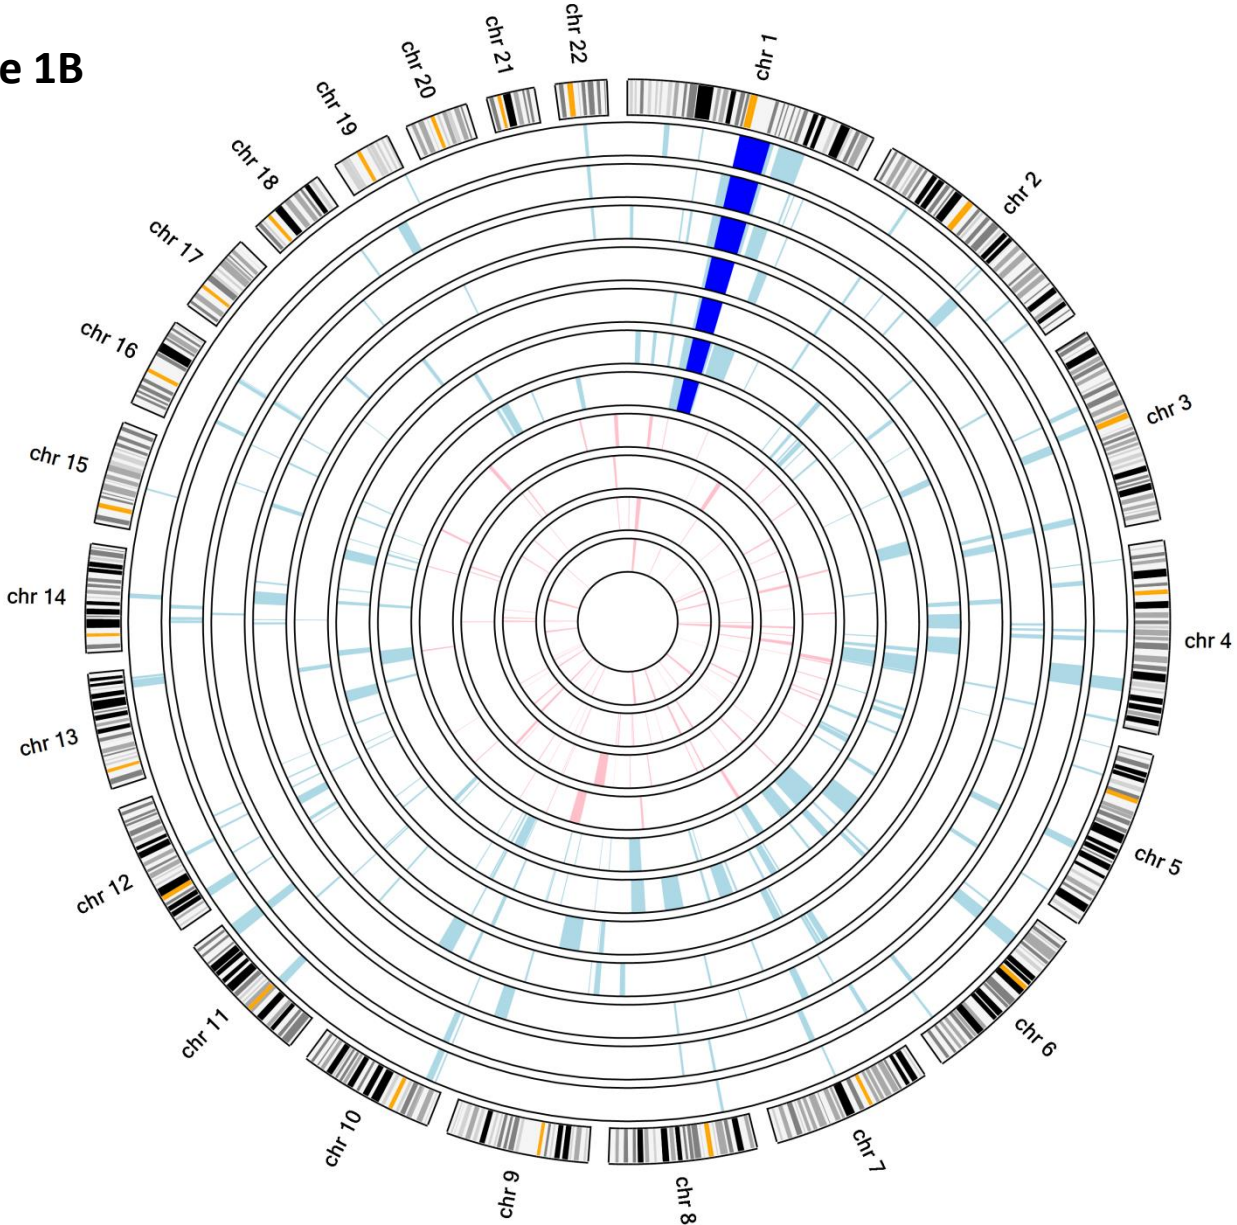

Supplement: inline-supplementary-material-1 [file inline-supplementary-material-1.pdf]
